# Supplementary material for: Composite dietary antioxidant index associated with delayed biological aging: a population-based study
Source: publisher site journal article supplement (doi:10.18632/aging.205232), 2024-01-02
Supplement: Supplementary file [file aging-v16i1-205232-supplementary-material-SD1.pdf]

**SUPPLEMENTARY FIGURE**

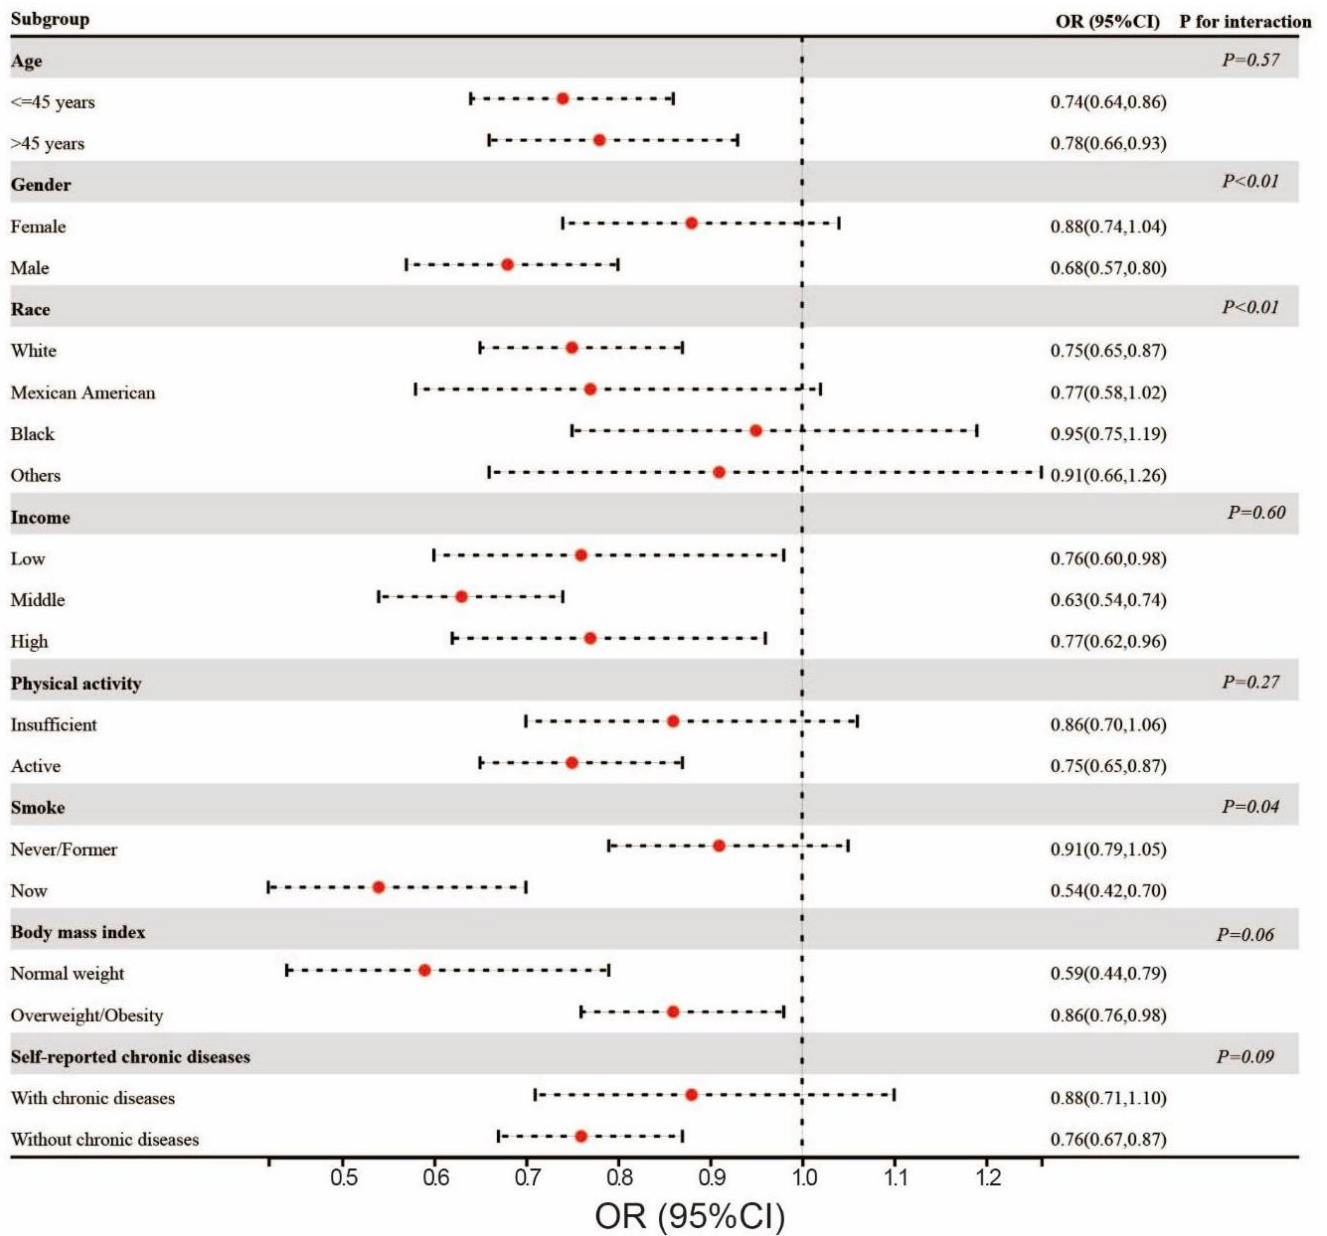

Supplementary Figure 1. Subgroup analyses of the association between CADI and odds ratio of accelerated aging stratified by age, gender, race, income, physical activity, smoking, BMI, and self-reported chronic diseases.
