# Supplementary material for: Composite dietary antioxidant index associated with delayed biological aging: a population-based study
Source: publisher site journal article supplement (doi:10.18632/aging.205232), 2024-01-02
Supplement: Supplementary file [file aging-v16i1-205232-supplementary-material-SD2.pdf]

## SUPPLEMENTARY TABLE

**Supplementary Table 1. Associations of composite dietary antioxidant index (CDAI) with odds ratio of accelerated aging in multivariate logistic analysis.**

| <b>Total carotenoid</b> | <b>Model I OR(95%CI)</b> | <b>P</b> | <b>Model II OR(95%CI)</b> | <b>P</b> | <b>Model III OR(95%CI)</b> | <b>P</b> |
|-------------------------|--------------------------|----------|---------------------------|----------|----------------------------|----------|
| Continuous (per SD)     | 0.87(0.82,0.91)          | <0.01    | 0.91(0.86,0.96)           | <0.01    | 0.91(0.85,0.97)            | 0.01     |
| Quartiles               |                          |          |                           |          |                            |          |
| Quartile 1              | Reference                |          | Reference                 |          | Reference                  |          |
| Quartile 2              | 0.73(0.65,0.82)          | <0.01    | 0.79(0.70,0.89)           | <0.01    | 0.81(0.71,0.92)            | <0.01    |
| Quartile 3              | 0.69(0.62,0.76)          | <0.01    | 0.78(0.70,0.86)           | <0.01    | 0.78(0.70,0.87)            | <0.01    |
| Quartile 4              | 0.40(0.35,0.45)          | <0.01    | 0.46(0.40,0.52)           | <0.01    | 0.62(0.54,0.71)            | <0.01    |
| P for trend             |                          | <0.01    |                           | <0.01    |                            | <0.01    |

Model I: non-adjusted model; Model II: adjusted for age gender, race, marital status, education level, and family income-to-poverty ratio; Model III: adjusted for covariates of model 2, and smoking status, drinking status, estimated glomerular filtration rate, body mass index, total energy intake, physical activity, history of cancer, cardiovascular disease, and diabetes.
